# Supplementary material for: A plasmid system with tunable copy number
Source: PubMed Central journal article supplement (PMC9263177; doi:10.1038/s41467-022-31422-0), 2022-07-07
Supplement: 41467_2022_31422_MOESM2_ESM.pdf [file 41467_2022_31422_MOESM2_ESM.pdf]

**Title:** Supplementary Data 1:

**Description:** Promoter Sequences, Next-generation sequencing counts, Relative Growth Rates, Predicted Plasmid CopyNumbers, and Predicted Promoter Strength for priming RNA variants used in this work

**Title:** Supplementary Data 2:

**Description:** Promoter Sequences, Next-generation sequencing counts, Relative Growth Rates, Predicted Plasmid Copy Numbers, and Predicted Promoter Strength for inhibitory RNA variants used in this work

**Title:** Supplementary Data 3:

**Description:** Sequencing Counts at each time point for priming RNA variants

**Title:** Supplementary Movie 1:

**Description:** Timelapse movie showing an increase in the fraction of elongated cells at high aTc levels.
